# Supplementary material
Source: Royal Society of Chemistry journal article supplement (doi:10.1039/d6dt00374e)
Supplement: d6dt00374e1.pdf [file d6dt00374e1.pdf]

# Structural diversity of dimethylgallium naphthalene-2,3-dicarboxylate/pyridine systems

## Supporting information

Maksymilian Solka,<sup>a†</sup> Michał Terlecki,<sup>b†</sup> Iwona Justyniak,<sup>\*a</sup> Wanda Ziemkowska,<sup>b</sup>  
Daniel Prochowicz,<sup>a</sup> Janusz Lewiński<sup>\*ab</sup>

<sup>a</sup>Institute of Physical Chemistry, Polish Academy of Sciences, Kasprzaka 44/52, 01-224 Warsaw, Poland.

<sup>b</sup>Faculty of Chemistry, Warsaw University of Technology, Noakowskiego 3, 00-664 Warsaw, Poland

*E-mail:* janusz.lewinski@pw.edu.pl

### Table of Contents

|                                                                                 |     |
|---------------------------------------------------------------------------------|-----|
| 1. X-Ray Crystallography Data .....                                             | S2  |
| 2. Analysis of Coordination Environments by Continuous Shape Measurements ..... | S11 |
| 3. NMR spectra.....                                                             | S12 |
| 4. FTIR spectra.....                                                            | S13 |

## 1. X-Ray Crystallography Data

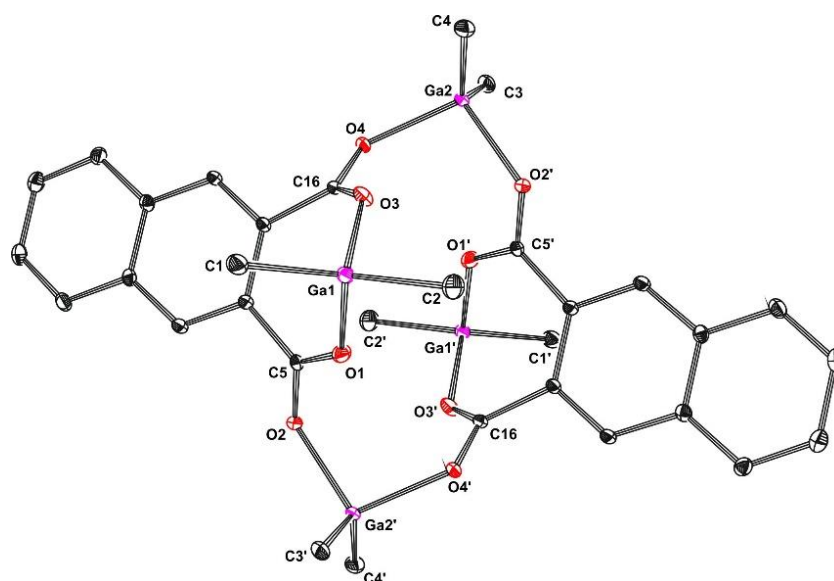

**Fig. S1.** The molecular structure of **1** with thermal ellipsoids set at 30% probability. Hydrogen atoms have been omitted for clarity. Operators for generated equivalent atoms:  $(-x+1, -y+1, -z+2)$ ,  $(-x+1, -y+1, -z+1)$ .

**Table S1.** Crystallographic data and structure refinement parameters for **1**.

|                                      |                                                              |                            |
|--------------------------------------|--------------------------------------------------------------|----------------------------|
| Empirical formula                    | $C_{33}H_{38}Cl_2Ga_4O_8$                                    |                            |
| Formula weight                       | 912.41                                                       |                            |
| Temperature                          | 100(2) K                                                     |                            |
| Wavelength                           | 0.71073 Å                                                    |                            |
| Crystal system                       | Triclinic                                                    |                            |
| Space group                          | $P\bar{1}$                                                   |                            |
| Unit cell dimensions                 | $a = 9.2021(2)$ Å                                            | $\alpha = 83.711(2)^\circ$ |
|                                      | $b = 10.0945(3)$ Å                                           | $\beta = 86.881(2)^\circ$  |
|                                      | $c = 20.3227(3)$ Å                                           | $\gamma = 80.193(2)^\circ$ |
| Volume                               | $1847.78(7)$ Å <sup>3</sup>                                  |                            |
| Z                                    | 2                                                            |                            |
| Density (calculated)                 | 1.640 Mg/m <sup>3</sup>                                      |                            |
| Absorption coefficient               | 3.076 mm <sup>-1</sup>                                       |                            |
| F(000)                               | 916                                                          |                            |
| Theta range for data collection      | 2.018 to 26.999°                                             |                            |
| Index ranges                         | $-11 \leq h \leq 11, -12 \leq k \leq 12, -25 \leq l \leq 25$ |                            |
| Reflections collected                | 41567                                                        |                            |
| Independent reflections              | 8043 [ $R_{int} = 0.1231$ ]                                  |                            |
| Completeness to theta = 25.242°      | 99.9 %                                                       |                            |
| Refinement method                    | Full-matrix least-squares on $F^2$                           |                            |
| Data / restraints / parameters       | 8043 / 0 / 432                                               |                            |
| Goodness-of-fit on $F^2$             | 1.060                                                        |                            |
| Final R indices [ $I > 2\sigma(I)$ ] | $R_1 = 0.0339, wR_2 = 0.0930$                                |                            |
| R indices (all data)                 | $R_1 = 0.0379, wR_2 = 0.0982$                                |                            |
| Largest diff. peak and hole          | 0.823 and -0.780 e. Å <sup>-3</sup>                          |                            |

$$R1 = \sum ||Fo| - |Fc|| / \sum |Fo|. \quad {}^b wR2 = [\sum w(Fo^2 - Fc^2)^2 / \sum w(Fo^2)^2]^{1/2}$$

**Table S2.** Selected bond lengths (Å) and angles (deg) for **1**.

**Bond Lengths (Å)**

|        |          |         |          |
|--------|----------|---------|----------|
| Ga1-C1 | 1.951(2) | Ga2-O2' | 1.991(1) |
| Ga1-C2 | 1.939(2) | Ga2-O4  | 1.981(1) |
| Ga2-C3 | 1.955(2) | C5-O1   | 1.263(3) |
| Ga2-C4 | 1.950(2) | C5-O2   | 1.256(2) |
| Ga1-O1 | 1.943(1) | C16-O3  | 1.260(3) |
| Ga1-O3 | 1.943(2) | C16-O4  | 1.260(3) |

**Bond Angles (deg)**

|            |            |           |            |             |           |
|------------|------------|-----------|------------|-------------|-----------|
| O1-C5-O2   | 120.94(19) | O1-Ga1-C1 | 108.36(8)  | O4-Ga2-C4   | 110.47(8) |
| O3-C16-O4  | 121.27(19) | O1-Ga1-C2 | 103.73(9)  | O2-Ga2'-C3' | 108.02(8) |
| Ga1-O1-C5  | 132.13(14) | O3-Ga1-C1 | 111.13(9)  | O2-Ga2'-C4' | 102.38(9) |
| Ga2-O4-C16 | 121.54(14) | O3-Ga1-C2 | 101.25(10) |             |           |
| O1-Ga1-O3  | 90.40(7)   | O4-Ga2-C3 | 101.26(8)  |             |           |

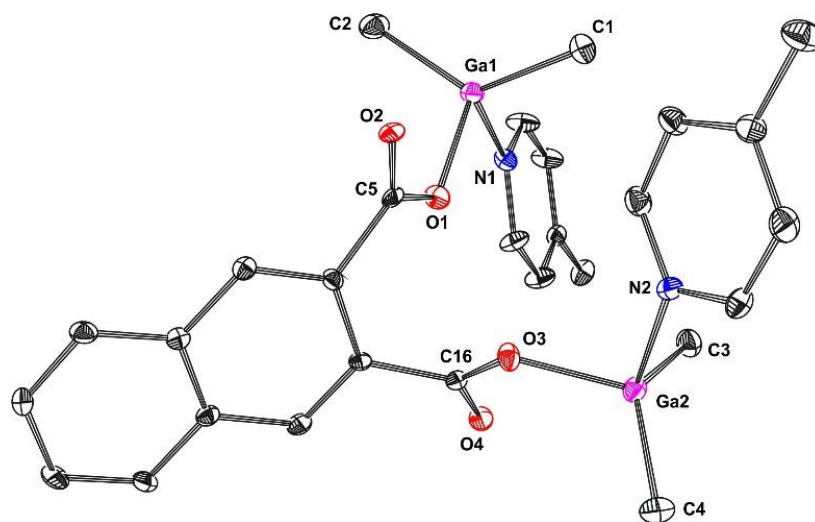

**Fig. S2.** The molecular structure of **2** with thermal ellipsoids set at 30% probability. Hydrogen atoms have been omitted for clarity.

**Table S3.** Crystallographic data and structure refinement parameters for **2**.

|                                              |                                                                               |                       |
|----------------------------------------------|-------------------------------------------------------------------------------|-----------------------|
| Empirical formula                            | C <sub>28</sub> H <sub>32</sub> Ga <sub>2</sub> N <sub>2</sub> O <sub>4</sub> |                       |
| Formula weight                               | 599.99                                                                        |                       |
| Temperature                                  | 100(2) K                                                                      |                       |
| Wavelength                                   | 0.71073 Å                                                                     |                       |
| Crystal system                               | Triclinic                                                                     |                       |
| Space group                                  | <i>P</i> $\bar{1}$                                                            |                       |
| Unit cell dimensions                         | <i>a</i> = 9.4740(4) Å                                                        | $\alpha$ = 83.380(2)° |
|                                              | <i>b</i> = 11.1300(5) Å                                                       | $\beta$ = 75.285(2)°  |
|                                              | <i>c</i> = 14.0500(6) Å                                                       | $\gamma$ = 78.768(2)° |
| Volume                                       | 1402.09(11) Å <sup>3</sup>                                                    |                       |
| Z                                            | 2                                                                             |                       |
| Density (calculated)                         | 1.421 Mg/m <sup>3</sup>                                                       |                       |
| Absorption coefficient                       | 1.956 mm <sup>-1</sup>                                                        |                       |
| F(000)                                       | 616                                                                           |                       |
| Theta range for data collection              | 1.870 to 26.000°                                                              |                       |
| Index ranges                                 | -11 ≤ <i>h</i> ≤ 11, -13 ≤ <i>k</i> ≤ 13, -17 ≤ <i>l</i> ≤ 17                 |                       |
| Reflections collected                        | 10407                                                                         |                       |
| Independent reflections                      | 5513 [ <i>R</i> <sub>int</sub> = 0.0841]                                      |                       |
| Completeness to theta = 25.242°              | 99.7 %                                                                        |                       |
| Refinement method                            | Full-matrix least-squares on <i>F</i> <sup>2</sup>                            |                       |
| Data / restraints / parameters               | 5513 / 0 / 331                                                                |                       |
| Goodness-of-fit on <i>F</i> <sup>2</sup>     | 1.097                                                                         |                       |
| Final R indices [ <i>I</i> > 2σ( <i>I</i> )] | <i>R</i> <sub>1</sub> = 0.0774, <i>wR</i> <sub>2</sub> = 0.1445               |                       |
| R indices (all data)                         | <i>R</i> <sub>1</sub> = 0.1224, <i>wR</i> <sub>2</sub> = 0.1633               |                       |
| Largest diff. peak and hole                  | 0.769 and -0.663 e. Å <sup>-3</sup>                                           |                       |

$$R_1 = \frac{\sum ||F_o| - |F_c||}{\sum |F_o|}, \quad {}^b wR_2 = \left[ \frac{\sum w(F_o^2 - F_c^2)^2}{\sum w(F_o^2)^2} \right]^{1/2}$$

**Table S4.** Selected bond lengths (Å) and angles (deg) for **2**.**Bond Lengths (Å)**

|        |          |        |          |        |          |
|--------|----------|--------|----------|--------|----------|
| Ga1-C1 | 1.955(8) | Ga2-O3 | 1.919(5) | C5-O1  | 1.300(8) |
| Ga1-C2 | 1.957(8) | Ga2-C3 | 1.962(8) | C5-O2  | 1.231(8) |
| Ga1-N1 | 2.068(6) | Ga2-C4 | 1.960(8) | C16-O3 | 1.303(8) |
| Ga1-O1 | 1.910(5) | Ga2-N2 | 2.083(6) | C16-O4 | 1.229(8) |

**Bond Angles (deg)**

|            |          |           |            |             |           |
|------------|----------|-----------|------------|-------------|-----------|
| O1-C5-O2   | 123.8(7) | N1-Ga1-C1 | 102.8(3)   | O4-Ga2-C4   | 110.47(8) |
| O3-C16-O4  | 124.4(6) | N1-Ga1-C2 | 107.5(3)   | O2-Ga2'-C3' | 108.02(8) |
| Ga1-O1-C5  | 120.6(4) | N2-Ga2-O3 | 90.4(2)    | O2-Ga2'-C4' | 102.38(9) |
| Ga2-O3-C16 | 120.7(4) | N2-Ga2-C3 | 101.25(10) |             |           |
| N1-Ga1-O1  | 90.1(2)  | N2-Ga2-C4 | 101.26(8)  |             |           |

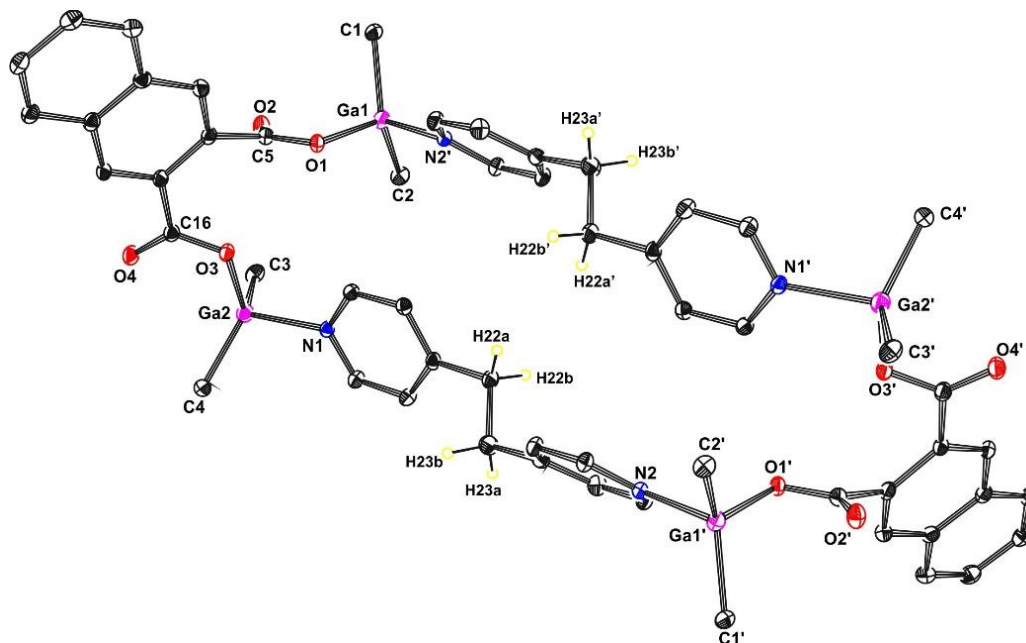

**Fig. S3.** The molecular structure of **3** with thermal ellipsoids set at 30% probability. Hydrogen atoms have been omitted for clarity. Operators for generated equivalent atoms:  $(-x+1, -y+1, -z+1)$ .

**Table S5.** Crystallographic data and structure refinement parameters for **3**.

|                                        |                                                                    |                              |
|----------------------------------------|--------------------------------------------------------------------|------------------------------|
| Empirical formula                      | $C_{56}H_{60}Ga_4N_4O_8$                                           |                              |
| Formula weight                         | 1195.96                                                            |                              |
| Temperature                            | 100(2) K                                                           |                              |
| Wavelength                             | 0.71073 Å                                                          |                              |
| Crystal system                         | Monoclinic                                                         |                              |
| Space group                            | $P2_1/n$                                                           |                              |
| Unit cell dimensions                   | $a = 10.5847(3)$ Å                                                 | $\alpha = 90^\circ$ .        |
|                                        | $b = 18.5066(3)$ Å                                                 | $\beta = 100.876(2)^\circ$ . |
|                                        | $c = 13.8257(3)$ Å                                                 | $\gamma = 90^\circ$ .        |
| Volume                                 | $2659.63(11)$ Å <sup>3</sup>                                       |                              |
| Z                                      | 4                                                                  |                              |
| Density (calculated)                   | $1.493$ Mg/m <sup>3</sup>                                          |                              |
| Absorption coefficient                 | $2.062$ mm <sup>-1</sup>                                           |                              |
| F(000)                                 | 1224                                                               |                              |
| Theta range for data collection        | $1.860$ to $25.652^\circ$ .                                        |                              |
| Index ranges                           | $-12 \leq h \leq 12$ , $-22 \leq k \leq 21$ , $-16 \leq l \leq 11$ |                              |
| Reflections collected                  | 19640                                                              |                              |
| Independent reflections                | 5002 [ $R_{int} = 0.0326$ ]                                        |                              |
| Completeness to theta = $25.242^\circ$ | 100.0 %                                                            |                              |
| Refinement method                      | Full-matrix least-squares on $F^2$                                 |                              |
| Data / restraints / parameters         | 5002 / 0 / 329                                                     |                              |
| Goodness-of-fit on $F^2$               | 1.044                                                              |                              |
| Final R indices [ $I > 2\sigma(I)$ ]   | $R_1 = 0.0359$ , $wR_2 = 0.0996$                                   |                              |
| R indices (all data)                   | $R_1 = 0.0410$ , $wR_2 = 0.1041$                                   |                              |
| Largest diff. peak and hole            | $0.486$ and $-0.510$ e. Å <sup>-3</sup>                            |                              |

$$R_1 = \frac{\sum ||F_o| - |F_c||}{\sum |F_o|}, \quad wR_2 = \left[ \frac{\sum w(F_o^2 - F_c^2)^2}{\sum w(F_o^2)^2} \right]^{1/2}$$

**Table S6.** Selected bond lengths (Å) and angles (deg) for **3**

**Bond Lengths (Å)**

|         |            |        |            |        |          |
|---------|------------|--------|------------|--------|----------|
| Ga1-C1  | 1.966(3)   | Ga2-O3 | 1.9142(18) | C5-O1  | 1.294(3) |
| Ga1-C2  | 1.962(3)   | Ga2-C3 | 1.959(3)   | C5-O2  | 1.224(3) |
| Ga1-N2' | 2.081(2)   | Ga2-C4 | 1.966(3)   | C16-O3 | 1.293(3) |
| Ga1-O1  | 1.9334(18) | Ga2-N1 | 2.078(2)   | C16-O4 | 1.225(3) |

**Bond Angles (deg)**

|            |            |            |            |            |            |
|------------|------------|------------|------------|------------|------------|
| O1-C5-O2   | 124.2(2)   | N2'-Ga1-O1 | 88.89(8)   | N2'-Ga1-C2 | 104.46(11) |
| O3-C16-O4  | 124.7(3)   | O1-Ga1-C1  | 104.71(10) | N1-Ga2-C3  | 110.75(11) |
| Ga1-O1-C5  | 109.95(17) | O1-Ga1-C2  | 115.70(11) | N1-Ga2-C4  | 102.60(11) |
| Ga2-O3-C16 | 116.45(17) | N2'-Ga1-C1 | 107.92(11) |            |            |

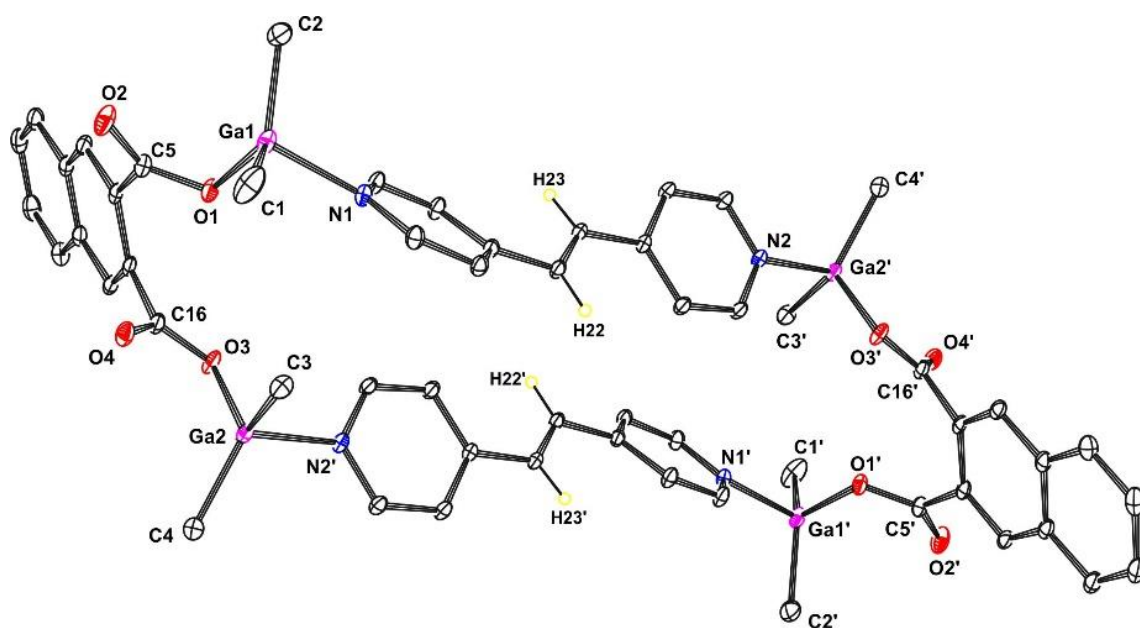

**Fig. S4.** The molecular structure of **4** with thermal ellipsoids set at 30% probability. Hydrogen atoms have been omitted for clarity. Operators for generated equivalent atoms:  $(-x+3/2, -y+3/2, -z+1)$ .

**Table S7.** Crystallographic data and structure refinement parameters for **4**.

|                                              |                                                                               |                          |
|----------------------------------------------|-------------------------------------------------------------------------------|--------------------------|
| Empirical formula                            | C <sub>56</sub> H <sub>56</sub> Ga <sub>4</sub> N <sub>4</sub> O <sub>8</sub> |                          |
| Formula weight                               | 794.62                                                                        |                          |
| Temperature                                  | 100(2) K                                                                      |                          |
| Wavelength                                   | 0.71073 Å                                                                     |                          |
| Crystal system                               | Monoclinic                                                                    |                          |
| Space group                                  | C2/c                                                                          |                          |
| Unit cell dimensions                         | <i>a</i> = 18.8661(3) Å                                                       | <i>α</i> = 90°.          |
|                                              | <i>b</i> = 13.2599(2) Å                                                       | <i>β</i> = 94.2370(10)°. |
|                                              | <i>c</i> = 21.6552(2) Å                                                       | <i>γ</i> = 90°.          |
| Volume                                       | 5402.51(13) Å <sup>3</sup>                                                    |                          |
| Z                                            | 4                                                                             |                          |
| Density (calculated)                         | 1.465 Mg/m <sup>3</sup>                                                       |                          |
| Absorption coefficient                       | 2.030 mm <sup>-1</sup>                                                        |                          |
| F(000)                                       | 2432                                                                          |                          |
| Theta range for data collection              | 2.138 to 30.118°.                                                             |                          |
| Index ranges                                 | -26 ≤ <i>h</i> ≤ 26, -18 ≤ <i>k</i> ≤ 18, -30 ≤ <i>l</i> ≤ 30                 |                          |
| Reflections collected                        | 64560                                                                         |                          |
| Independent reflections                      | 7581 [ <i>R</i> <sub>int</sub> = 0.0309]                                      |                          |
| Completeness to theta = 25.242°              | 99.8 %                                                                        |                          |
| Refinement method                            | Full-matrix least-squares on F <sup>2</sup>                                   |                          |
| Data / restraints / parameters               | 7581 / 0 / 329                                                                |                          |
| Goodness-of-fit on F <sup>2</sup>            | 1.109                                                                         |                          |
| Final R indices [ <i>I</i> > 2σ( <i>I</i> )] | <i>R</i> <sub>1</sub> = 0.0337, <i>wR</i> <sub>2</sub> = 0.0878               |                          |
| R indices (all data)                         | <i>R</i> <sub>1</sub> = 0.0434, <i>wR</i> <sub>2</sub> = 0.0925               |                          |
| Largest diff. peak and hole                  | 1.164 and -0.658 e.Å <sup>-3</sup>                                            |                          |

$$R_1 = \frac{\sum ||F_o| - |F_c||}{\sum |F_o|} \quad {}^b \quad wR_2 = [\sum w(F_o^2 - F_c^2)^2 / \sum w(F_o^2)^2]^{1/2}$$

**Table S8.** Selected bond lengths (Å) and angles (deg) for **4****Bond Lengths (Å)**

|        |            |         |            |        |          |
|--------|------------|---------|------------|--------|----------|
| Ga1-C1 | 1.948(3)   | Ga2-O3  | 1.9363(14) | C5-O1  | 1.293(2) |
| Ga1-C2 | 1.965(3)   | Ga2-C3  | 1.957(2)   | C5-O2  | 1.224(3) |
| Ga1-N1 | 2.0616(16) | Ga2-C4  | 1.953(2)   | C16-O3 | 1.291(2) |
| Ga1-O1 | 1.9163(15) | Ga2-N2' | 2.0861(16) | C16-O4 | 1.231(2) |

**Bond Angles (deg)**

|            |            |           |            |            |            |
|------------|------------|-----------|------------|------------|------------|
| O1-C5-O2   | 124.8(2)   | N1-Ga1-O1 | 88.66(6)   | C3-Ga2-C4  | 125.98(10) |
| O3-C16-O4  | 123.60(18) | O1-Ga1-C1 | 115.10(12) | O3-Ga2-C3  | 113.34(8)  |
| Ga1-O1-C5  | 118.38(13) | O1-Ga1-C2 | 107.13(10) | O3-Ga2-C4  | 112.30(9)  |
| Ga2-O3-C16 | 110.76(13) | N1-Ga1-C1 | 105.96(9)  | O3-Ga2-N2' | 88.31(6)   |

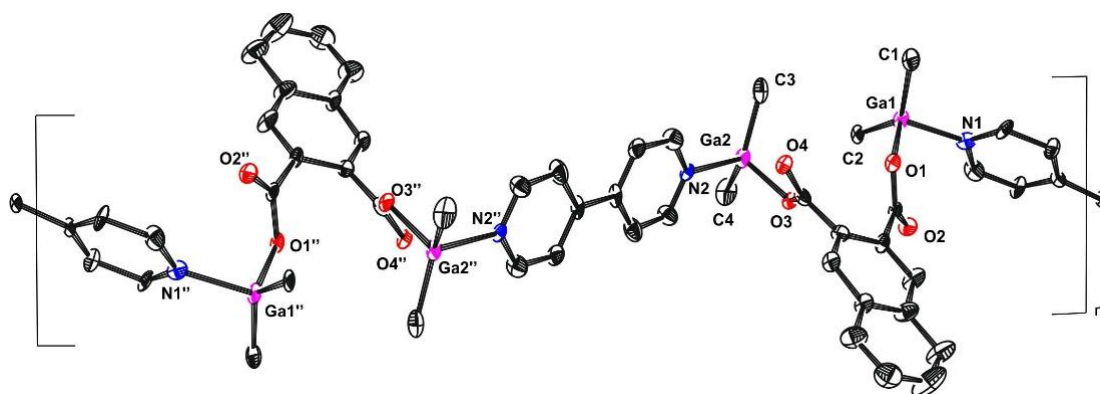

**Fig. S5.** The molecular structure of **5** with thermal ellipsoids set at 30% probability. Hydrogen atoms have been omitted for clarity. Operators for generated equivalent atoms:  $(-x, -y+1, -z+1)$ ,  $(-x+2, -y+1, -z)$

Unfortunately, due to the poor quality of the crystals and disorder of the DCM molecules, a fully satisfactory refinement of the crystal structure of **5** could not be achieved, precluding a detailed discussion of metrical parameters. Modification of the synthesis and crystallization conditions by employing other solvents did not better results.

**Table S9.** Crystallographic data and structure refinement parameters for **5**.

|                                      |                                                                                                |                                |
|--------------------------------------|------------------------------------------------------------------------------------------------|--------------------------------|
| Empirical formula                    | C <sub>57</sub> H <sub>56</sub> Cl <sub>10</sub> Ga <sub>4</sub> N <sub>4</sub> O <sub>8</sub> |                                |
| Formula weight                       | 1558.43                                                                                        |                                |
| Temperature                          | 100(2) K                                                                                       |                                |
| Wavelength                           | 1.54184 Å                                                                                      |                                |
| Crystal system                       | Triclinic                                                                                      |                                |
| Space group                          | $P\bar{1}$                                                                                     |                                |
| Unit cell dimensions                 | $a = 10.2423(18)$ Å                                                                            | $\alpha = 102.112(19)^\circ$ . |
|                                      | $b = 12.817(3)$ Å                                                                              | $\beta = 107.393(18)^\circ$ .  |
|                                      | $c = 15.306(3)$ Å                                                                              | $\gamma = 101.202(17)^\circ$ . |
| Volume                               | $1802.3(7)$ Å <sup>3</sup>                                                                     |                                |
| Z                                    | 1                                                                                              |                                |
| Density (calculated)                 | 1.436 Mg/m <sup>3</sup>                                                                        |                                |
| Absorption coefficient               | 5.518 mm <sup>-1</sup>                                                                         |                                |
| F(000)                               | 784                                                                                            |                                |
| Theta range for data collection      | 3.669 to 61.482°.                                                                              |                                |
| Index ranges                         | -11 ≤ h ≤ 9, -10 ≤ k ≤ 14, -17 ≤ l ≤ 14                                                        |                                |
| Reflections collected                | 8871                                                                                           |                                |
| Independent reflections              | 5301 [ $R_{int} = 0.1362$ ]                                                                    |                                |
| Completeness to theta = 61.482°      | 94.7 %                                                                                         |                                |
| Refinement method                    | Full-matrix least-squares on F <sup>2</sup>                                                    |                                |
| Data / restraints / parameters       | 5301 / 72 / 392                                                                                |                                |
| Goodness-of-fit on F <sup>2</sup>    | 1.491                                                                                          |                                |
| Final R indices [ $I > 2\sigma(I)$ ] | $R_1 = 0.1792$ , $wR_2 = 0.4417$                                                               |                                |
| R indices (all data)                 | $R_1 = 0.2320$ , $wR_2 = 0.4768$                                                               |                                |
| Largest diff. peak and hole          | 2.756 and -1.664 e.Å <sup>-3</sup>                                                             |                                |

---


$$R_1 = \frac{\sum ||F_o| - |F_c||}{\sum |F_o|}. \quad {}^b wR_2 = \frac{[\sum w(F_o^2 - F_c^2)^2 / \sum w(F_o^2)^2]^{1/2}}$$

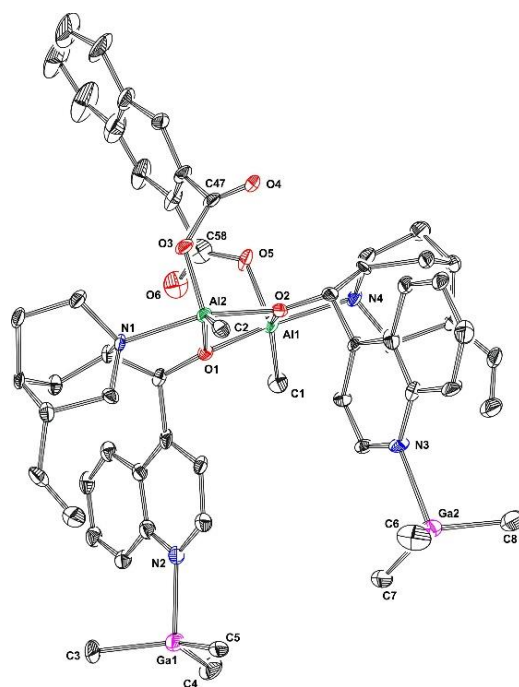

**Fig. S6.** The molecular structure of **6** with thermal ellipsoids set at 30% probability. Hydrogen atoms have been omitted for clarity.

**Table S10.** Crystallographic data and structure refinement parameters for **6**.

|                                             |                                                                                                   |                            |
|---------------------------------------------|---------------------------------------------------------------------------------------------------|----------------------------|
| Empirical formula                           | C <sub>274</sub> H <sub>334</sub> Al <sub>8</sub> Ga <sub>8</sub> N <sub>16</sub> O <sub>24</sub> |                            |
| Formula weight                              | 5009.15                                                                                           |                            |
| Temperature                                 | 100(2) K                                                                                          |                            |
| Wavelength                                  | 1.54184 Å                                                                                         |                            |
| Crystal system                              | Triclinic                                                                                         |                            |
| Space group                                 | P1                                                                                                |                            |
| Unit cell dimensions                        | $a = 14.0030(4) \text{ \AA}$                                                                      | $\alpha = 83.921(3)^\circ$ |
|                                             | $b = 20.4774(7) \text{ \AA}$                                                                      | $\beta = 75.537(3)^\circ$  |
|                                             | $c = 26.4863(10) \text{ \AA}$                                                                     | $\gamma = 71.123(3)^\circ$ |
| Volume                                      | 6956.0(4) Å <sup>3</sup>                                                                          |                            |
| Z                                           | 2                                                                                                 |                            |
| Density (calculated)                        | 1.196 Mg/m <sup>3</sup>                                                                           |                            |
| Absorption coefficient                      | 1.584 mm <sup>-1</sup>                                                                            |                            |
| F(000)                                      | 2634                                                                                              |                            |
| Theta range for data collection             | 2.821 to 70.153°.                                                                                 |                            |
| Index ranges                                | -17<= <i>h</i> <=16, -24<= <i>k</i> <=22, -31<= <i>l</i> <=32                                     |                            |
| Reflections collected                       | 32273                                                                                             |                            |
| Independent reflections                     | 32273 [ <i>R</i> <sub>int</sub> = 0.0565]                                                         |                            |
| Completeness to theta                       | 99.8 %                                                                                            |                            |
| Refinement method                           | Full-matrix least-squares on F <sup>2</sup>                                                       |                            |
| Data / restraints / parameters              | 32270 / 3 / 3009                                                                                  |                            |
| Goodness-of-fit on F <sup>2</sup>           | 1.103                                                                                             |                            |
| Final R indices [ <i>I</i> >2σ( <i>I</i> )] | <i>R</i> <sub>1</sub> = 0.0961, <i>wR</i> <sub>2</sub> = 0.1173                                   |                            |
| R indices (all data)                        | <i>R</i> <sub>1</sub> = 0.2596, <i>wR</i> <sub>2</sub> = 0.2798                                   |                            |
| Largest diff. peak and hole                 | 1.790 and -1.368 e.Å <sup>-3</sup>                                                                |                            |

---


$$R_1 = \frac{\sum ||F_o| - |F_c||}{\sum |F_o|}. \quad {}^b \text{ } wR_2 = \left[ \frac{\sum w(F_o^2 - F_c^2)^2}{\sum w(F_o^2)^2} \right]^{1/2}$$

**Table S11.** Selected bond lengths (Å) and angles (deg) for **6**

**Bond Lengths (Å)**

|        |           |        |           |        |           |
|--------|-----------|--------|-----------|--------|-----------|
| Al1-C1 | 1.965(13) | Al2-O2 | 1.929(8)  | Ga2-N3 | 2.140(10) |
| Al1-O1 | 1.944(8)  | Al2-O3 | 1.772(9)  | O3-C47 | 1.342(15) |
| Al1-O2 | 1.849(8)  | Al2-C2 | 1.972(13) | O4-C47 | 1.195(16) |
| Al1-O5 | 1.822(9)  | Al2-N1 | 2.111(9)  | O5-C58 | 1.266(19) |
| Al1-N4 | 2.169(11) | Al2-O3 | 1.772(9)  | O6-C58 | 1.30(2)   |
| Al2-O1 | 1.850(8)  | Ga1-N2 | 2.151(12) |        |           |

**Bond Angles (deg)**

|           |          |            |          |           |           |
|-----------|----------|------------|----------|-----------|-----------|
| C1-Al1-O1 | 96.3(5)  | Al1-O1-Al2 | 102.3(4) | C2-Al2-O3 | 117.9(5)  |
| C1-Al1-O2 | 140.8(6) | Al1-O2-Al2 | 102.9(4) | C2-Al2-N1 | 97.8(5)   |
| C1-Al1-O5 | 119.4(6) | C2-Al2-O1  | 139.1(5) | O3-C47-O4 | 124.2(11) |
| C1-Al1-N4 | 98.3(5)  | C2-Al2-O2  | 98.0(5)  | O5-C58-O6 | 123.0(16) |

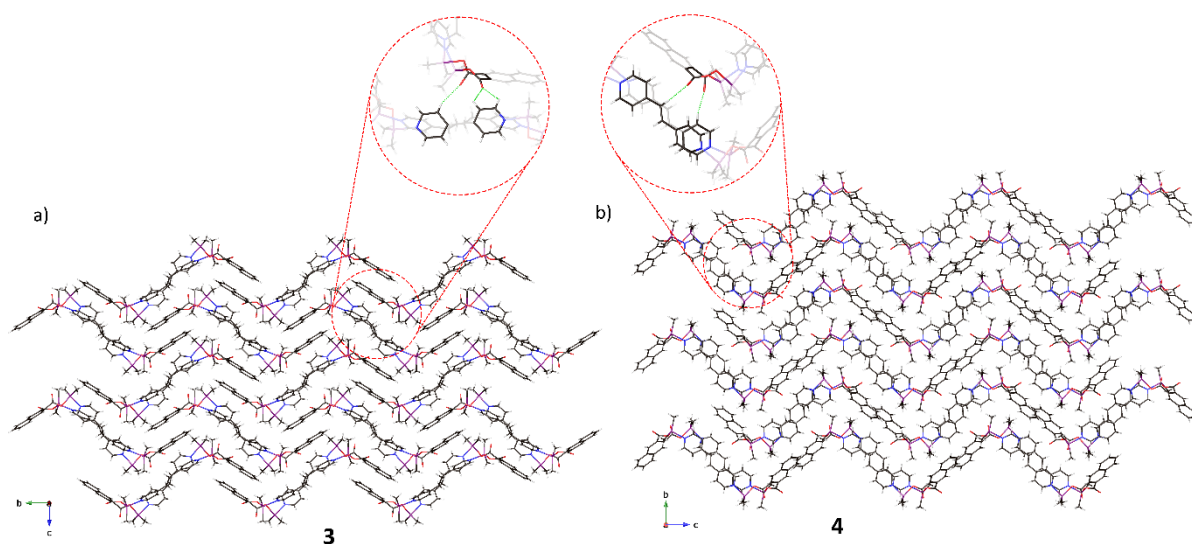

**Fig. S7.** Comparison of the crystal packing motifs in compounds **3** and **4**.

## 2. Analysis of Coordination Environments by Continuous Shape Measurements

The Continuous Shape Measurement (CShM) parameters were calculated using the SHAPE software.<sup>[1]</sup> The closer the calculated CShM value is to zero, the closer the coordination environment is to the corresponding ideal geometry.<sup>[2]</sup> CShM values were analyzed for complexes **1-4** and **6** considering the closest four and five donor atoms in the coordination spheres of the metal centers (Table S7). For complex **1**, the CShM values indicate a tetrahedral coordination geometry around the Ga centers, which is significantly more distorted for the chelated Ga centers (Ga1 and Ga3) than for the bridging ones (Ga2 and Ga4). In complexes **2-4**, the CShM values likewise point to predominantly tetrahedral coordination geometries at the metal centers. In these cases, the CShM values calculated assuming five nearest donor atoms are relatively high, consistent with the absence of a significant interaction at the fifth coordination site. In contrast, for complex **6**, CShM values calculated assuming four-coordinate Al centers indicate a vacant trigonal-bipyramidal geometry of coordination sphere, in agreement with the presence of an additional interaction occupying the fifth position. The CShM values calculated assuming a five-coordinate coordination sphere are comparable for trigonal-bipyramidal and square-pyramidal reference geometries, indicating a coordination environment that deviates substantially from ideal geometries. This distortion from an ideal trigonal-bipyramidal geometry is likely imposed by ligand-related geometric constraints, like the formation of AlNCCO macrocycles by chelating CN ligands and the specific conformation of bridging naphtha ligands.

**Table S12.** Calculated CShM parameters for complexes **1-4** and **6** considering four- and five-coordinate metal environments. CShM( $T_d$ ) and CShM( $C_{3v}$ ) correspond to tetrahedral and vacant trigonal-bipyramidal geometries for four-coordinate centers, respectively, while CShM( $D_{3h}$ ) and CShM( $C_{4v}$ ) correspond to trigonal-bipyramidal and square-pyramidal geometries for five-coordinate centers, respectively.

| Metal center     | four-coordinate environment | CShM( $T_d$ ) | CShM( $C_{3v}$ ) | Fifth donor center | CShM( $D_{3h}$ ) | CShM( $C_{4v}$ ) |
|------------------|-----------------------------|---------------|------------------|--------------------|------------------|------------------|
| <b>Complex 1</b> |                             |               |                  |                    |                  |                  |
| Ga1              | C1 C2 O1 O3                 | 1.760         | 2.551            |                    |                  |                  |
| Ga2              | C3 C4 O2 O4                 | 0.997         | 2.861            |                    |                  |                  |
| Ga3              | C17 C18 O5 O7               | 1.555         | 2.392            |                    |                  |                  |
| Ga4              | C19 C20, O6 O8              | 0.939         | 2.793            |                    |                  |                  |
| <b>Complex 2</b> |                             |               |                  |                    |                  |                  |
| Ga1              | C1, C2, O1, N1              | 1.229         | 2.041            | O2                 | 7.964            | 9.035            |
| Ga2              | C3, C4, O3, N2              | 1.316         | 1.816            | O4                 | 8.720            | 7.247            |
| <b>Complex 3</b> |                             |               |                  |                    |                  |                  |
| Ga1              | C1 C2 O1 N2                 | 1.455         | 2.434            | O2                 | 5.440            | 6.618            |
| Ga2              | C3 C4 O3 N1                 | 1.256         | 2.585            | O4                 | 7.059            | 6.370            |
| <b>Complex 4</b> |                             |               |                  |                    |                  |                  |
| Ga1              | C1 C2 O1 N1                 | 1.433         | 2.011            | O2                 | 7.633            | 7.884            |
| Ga2              | C3 C4 O3 N2                 | 1.312         | 1.718            | O4                 | 6.128            | 5.684            |
| <b>Complex 6</b> |                             |               |                  |                    |                  |                  |
| Al1              | C1 O1 O2 O5                 | 6.427         | 3.233            | N4                 | 3.600            | 2.405            |
| Al2              | C2 O1 O2 O3                 | 6.011         | 2.751            | N1                 | 2.866            | 2.867            |
| Al3              | C59 O7 O8 O9                | 6.084         | 2.887            | N7                 | 3.000            | 2.930            |
| Al4              | C60 O7 O8 O11               | 7.062         | 3.870            | N5                 | 3.962            | 1.924            |
| Al5              | C118 O13 O14 O15            | 6.610         | 3.371            | N11                | 3.468            | 2.428            |
| Al6              | C119 O13 O14 O17            | 6.815         | 3.899            | N9                 | 3.969            | 1.987            |
| Al7              | C176 O19 O20 O00L           | 6.272         | 3.170            | N15                | 3.392            | 2.723            |
| Al8              | C177 O19 O20 O00S           | 5.802         | 2.575            | N13                | 2.785            | 3.063            |

### 3. NMR spectra

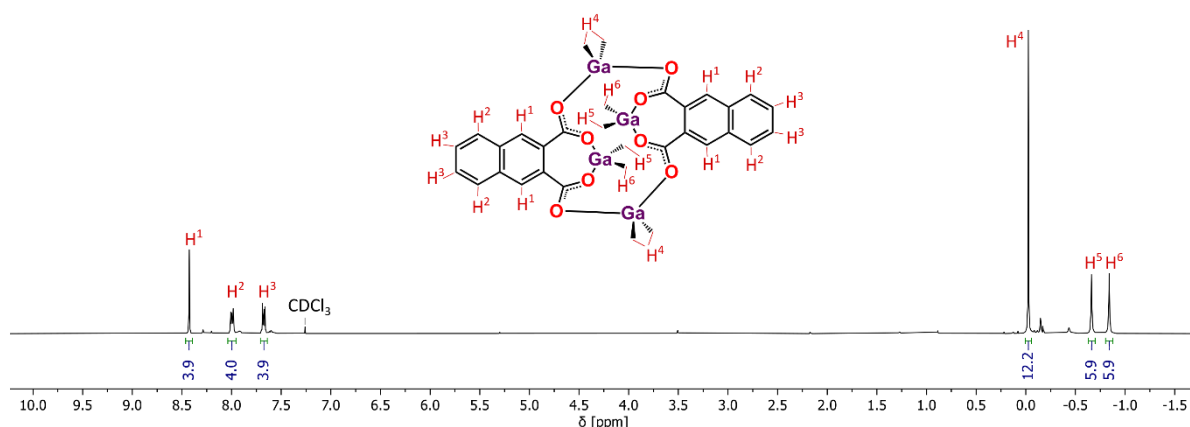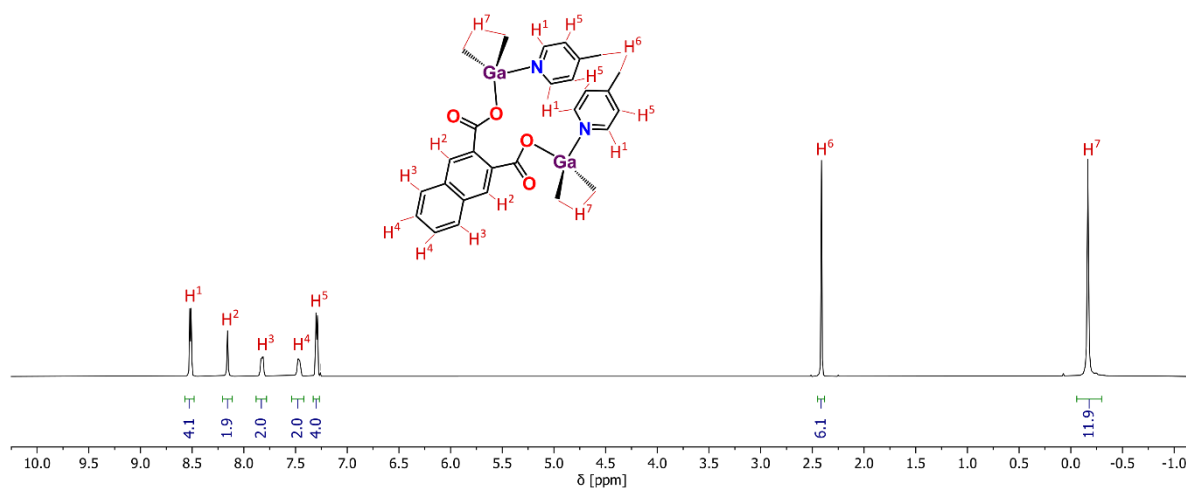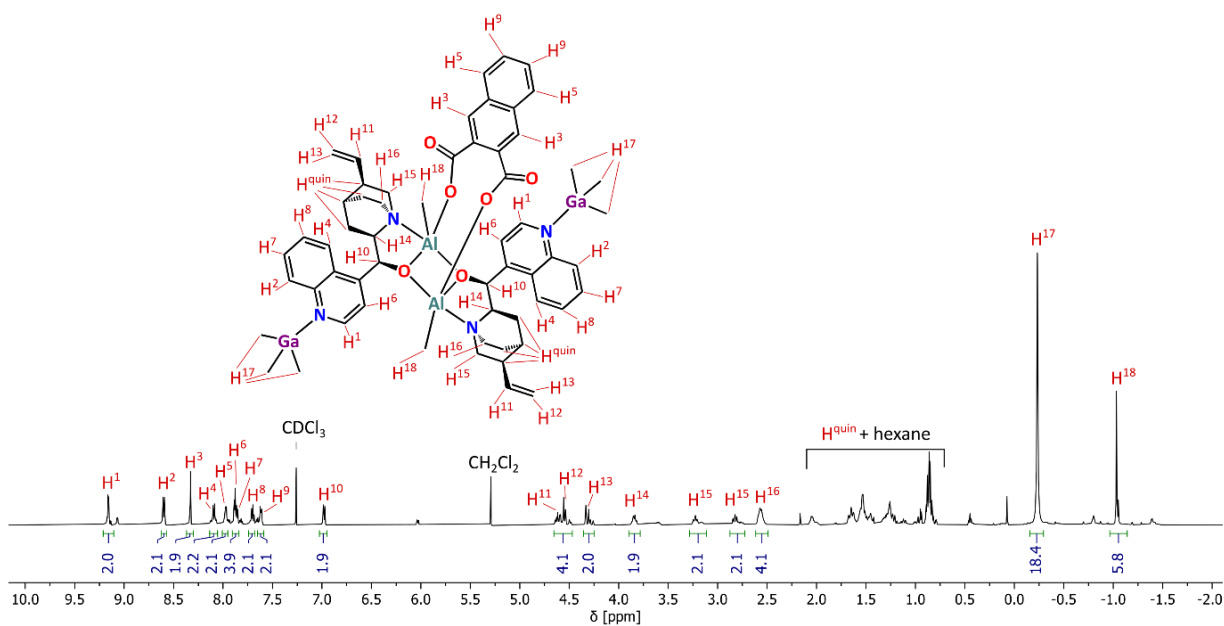

#### 4. FTIR spectra

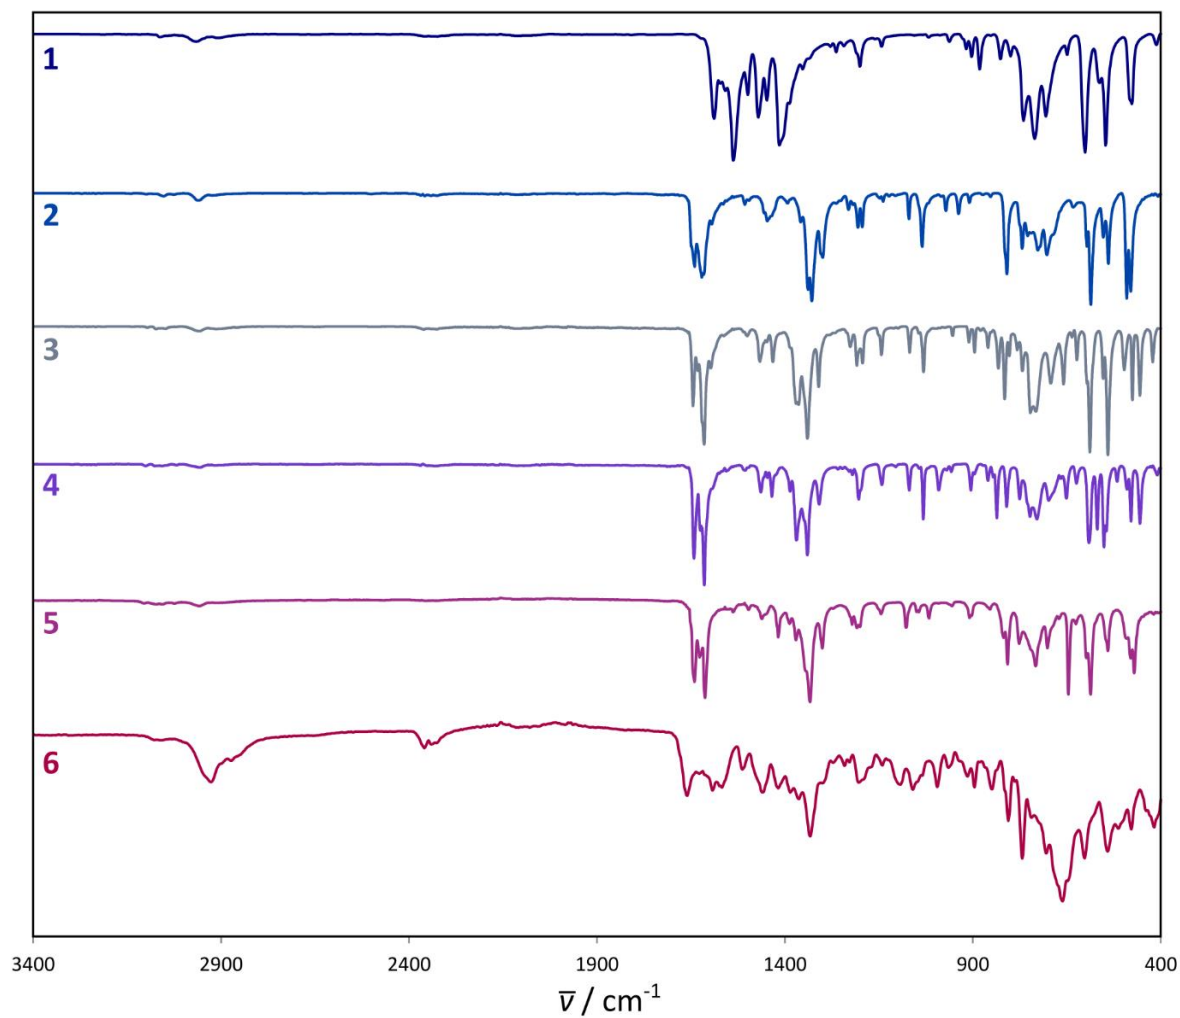

**Fig. S11.** Solid-state ATR FTIR spectra of compounds **1-6**.

#### References:

- [1] M. Lluell, D. Casanova, J. Cirera, P. Alemany, S. Alvarez, **2013**, SHAPE Version 2.1.
- [2] H. Zabrodsky, S. Peleg, D. Avnir, *J. Am. Chem. Soc.* **1992**, *114*, 7843–7851.
